# Supplementary material for: Molecular Docking Insight into the Label-Free Fluorescence Aptasensor for Ochratoxin A Detection
Source: MDPI journal article supplement (doi:10.3390/molecules28124841), 2023-06-18
Supplement: s1 [file s1]

## Electronic Supplementary Material for

# Molecular Docking Insight into the Label-Free Fluorescence Aptasensor for Ochratoxin A Detection

Hua Ye <sup>1,\*</sup>, Mengyuan Wang <sup>1</sup>, Xi Yu <sup>1,2</sup>, Pengfei Ma <sup>2</sup>, Ping Zhu <sup>1</sup>, Jianjun Zhong <sup>1</sup>, Kuo He <sup>3</sup> and Yuanxin Guo <sup>1</sup>

<sup>1</sup> School of Grain Science and Technology, Jiangsu University of Science and Technology, Zhenjiang 212100, China

<sup>2</sup> School of Food Science and Technology, Jiangnan University, Wuxi 214122, China

<sup>3</sup> College of Agriculture and Forestry Science and Technology, Hebei North University, Zhangjiakou 075000, China

\* Correspondence: huaye@just.edu.cn

## Table of Contents

**Figure S1** Chemistry structural of Ochratoxin A

**Table S1.** A list of label-free fluorescence aptasensor for OTA detection

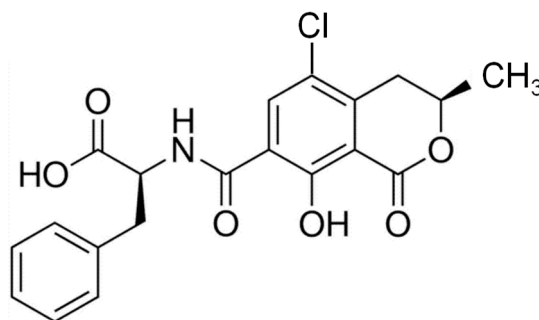

**Figure S1** Chemistry structural of Ochratoxin A

**Table S1.** A list of label-free fluorescence aptasensor for OTA detection

| Fluorescent donor   | Samples           | Linear Range  | LOD     | References |
|---------------------|-------------------|---------------|---------|------------|
| SYBR Gold           | Red wine and beer | 20-500 nM     | 16.5 nM | [1]        |
| AIE (DSAI)          | Red wine          | 12.38-1238 nM | 4.7 nM  | [2]        |
| Thioflavin T (ThT)  | Red wine          | 2.97-495 nM   | 0.99 nM | [3]        |
| Crystal violet (CV) | Red wine          | 0.56-7.8 nM   | 0.56 nM | [4]        |
| Tb <sup>3+</sup>    | Wheat             | 0.248-2.48 nM | 49.5 pM | [5]        |
| Thioflavin T (ThT)  | Wheat flour       | 5-150 nM      | 3.42 nM | This paper |

## References

1. Lv, L.; Li, D.; Liu, R.; Cui, C.; Guo, Z. Label-free aptasensor for ochratoxin A detection using SYBR Gold as a probe. *Sensors and Actuators B: Chemical* **2017**, *246*, 647-652, doi:10.1016/j.snb.2017.02.143.
2. Lv, L.; Cui, C.; Xie, W.; Sun, W.; Ji, S.; Tian, J.; Guo, Z. A label-free aptasensor for turn-on fluorescent detection of ochratoxin A based on aggregation-induced emission probe. *Methods Appl Fluoresc* **2019**, *8*, 015003, doi:10.1088/2050-6120/ab4edf.
3. Wu, K.; Ma, C.; Zhao, H.; He, H.; Chen, H. Label-Free G-Quadruplex Aptamer Fluorescence Assay for Ochratoxin A Using a Thioflavin T Probe. *Toxins (Basel)* **2018**, *10*, doi:10.3390/toxins10050198.
4. Yang, C.; Dong, S.-N.; Abbas, F.; Chu, X.-L.; Fan, A.-Q.; Rhouati, A.; Mao, J.; Liu, Y. Label-free fluorescence aptasensor for ochratoxin A using crystal violet as displacement-type probe. *Chinese Journal of Analytical Chemistry* **2021**, *49*, 55-62, doi:10.1016/j.cjac.2021.07.005.
5. Zhang, J.; Zhang, X.; Yang, G.; Chen, J.; Wang, S. A signal-on fluorescent aptasensor based on Tb<sup>3+</sup> and structure-switching aptamer for label-free detection of Ochratoxin A in wheat. *Biosens Bioelectron* **2013**, *41*, 704-709, doi:10.1016/j.bios.2012.09.053.
